# Supplementary material for: High-efficiency tunable self-trapped exciton emission in one-dimensional β-Cs3Cu2Br5via Ag alloying for optoelectronic applications
Source: Royal Society of Chemistry journal article supplement (doi:10.1039/d4qi00970c), 2024-01-01
Supplement: d4qi00970c1.pdf [file d4qi00970c1.pdf]

Electronic Supplementary Material (ESI) for Inorganic Chemistry Frontiers.

# High-Efficiency Tunable Self-Trapped Emission in One-Dimensional $\beta$ -Cs<sub>3</sub>Cu<sub>2</sub>Br<sub>5</sub> via Ag Alloying for Optoelectronic Application

*Xin Xu,<sup>a</sup> Zhongyi Wang,<sup>a</sup> Qingkun Kong,<sup>b</sup> Siping Liu,<sup>c</sup> Ruiling Zhang\*,<sup>a</sup> Xiaojing Liu\*,<sup>a</sup> and Keli Han.<sup>a,d</sup>*

<sup>a</sup> Institute of Frontier Chemistry, School of Chemistry and Chemical Engineering, Shandong University, Qingdao, 266237, P.R. China.

<sup>b</sup> Key Laboratory of Catalytic Conversion and Clean Energy in Universities of Shandong Province, School of Chemistry and Chemical Engineering, Qufu Normal University, Qufu 273165, P. R. China.

<sup>c</sup> Guangxi Key Laboratory of Chemistry and Engineering of Forest Products, School of Chemistry and Chemical Engineering, Guangxi Minzu University, Nanning 530006, P. R. China.

<sup>d</sup> State Key Laboratory of Molecular Reaction Dynamics, Dalian Institute of Chemical Physics, Chinese Academy of Science, Dalian 116023, P.R.China.

## Corresponding Author

Xiaojing Liu\*, E-mail: liuxj2020@sdu.edu.cn; Ruiling Zhang\*, E-mail: rlzhang@sdu.edu.cn.

## Experimental Section

### **Materials**

Cesium bromide (CsBr, 99.99%), Silver bromide (AgBr, 99.99%), Hydrobromic acid (HBr, 48 wt.% in H<sub>2</sub>O) and Hypophosphorous acid (H<sub>3</sub>PO<sub>2</sub>, 50 wt.% in H<sub>2</sub>O) was purchased from Shanghai Aladdin Biochemical Technology Co., Ltd. Cuprous bromide (CuBr, 99.99%) was bought from TCI Shanghai Chemicals Industry Co., Ltd. All of the chemicals were used without further purifications.

### **Synthesis of Cs<sub>3</sub>Cu<sub>2</sub>Br<sub>5</sub> Single Crystals**

1.0 mmol CsBr, 0.25 mmol CuBr was added to 5 mL glass vial. 1.0 mL HBr and 0.2 mL H<sub>3</sub>PO<sub>2</sub> was then added. The mixture was heated to 165 °C on a hot plate for 30 min to dissolve the powders. Blue-emissive crystals were yielded after naturally cooling the solutions at ambient conditions, while the needle-like cyan-emissive crystals were yield after rapidly cooling down the hot solutions. The needle-like cyan-emissive crystals were unstable in ambient conditions.

### **Synthesis of Ag-alloyed Cs<sub>3</sub>Cu<sub>2</sub>Br<sub>5</sub> Single Crystals**

To synthesize Ag-alloyed Cs<sub>3</sub>Cu<sub>2</sub>Br<sub>5</sub> single crystals, 1.0 mmol CsBr, 0.25 mmol CuBr and x mg (x = 5, 10, 20, 30 and 40 mg) was added to 5 mL glass vial. 1.0 mL HBr and 0.2 mL H<sub>3</sub>PO<sub>2</sub> was then added. The mixture was heated to 165 °C on a hot plate for 30 min to dissolve the powders. Colorless crystals were yielded after naturally cooling at ambient conditions, the synthesized crystals were named as β-Cs<sub>3</sub>Cu<sub>2</sub>Br<sub>5</sub>:xAg<sup>+</sup> (x = 6.52%, 12.40%, 17.32%, 20.56% and 32.35%). The

product with addition of 5 mg Ag is unstable and will transform to OD blue emissive  $\text{Cs}_3\text{Cu}_2\text{Br}_5$  within several minutes in solutions.

### ***Characterization***

Powder X-ray diffraction (XRD) measurements were performed on a Rigaku smartlab9kw diffractometer equipped with Cu  $K\alpha$  radiation. Room-temperature photoluminescence (PL), time-resolved PL, temperature-dependent PL spectra were recorded on the FLS 1000 Edinburgh Instruments spectrofluorimeter equipped with a xenon lamp as the excitation source. Single Crystal X-ray diffraction (SCXRD) results were acquired by Rigaku Oxford XtaLAB Synergy-DW diffractometer with monochromated Mo  $K\alpha$  radiation ( $\lambda = 0.7107 \text{ \AA}$ ). X-ray photoelectron spectroscopy (XPS) measurements were performed by using Thermofisher ESCALAB Xi+ with the X-ray source of monochromated Al  $K\alpha$  ( $h\nu = 1486.6\text{eV}$ ). The absolute quantum yield was measured by Hamamatsu C9920-02 equipped with integrating sphere. Femtosecond transient absorption (fs TA) measurements were performed by a pump-probe laser system (800 nm, 50 fs, and 1 kHz repetition rate) based on a regenerative amplified Ti:sapphire laser source (Spectra Physics). The sample was excited by 340 nm laser pulses generated by a TOPAS Optical Parametric Amplifier (OPA) which was pumped by the 800 nm pulse. A white light continuum (WLC) generated by a 2 mm thick  $\text{CaF}_2$  was used as the probe beam. The excitation energy is 44  $\mu\text{W}$ .

### ***Calculation of tetrahedral parameters:***

Tetrahedral parameters of  $\Delta d$  and  $\sigma^2$  was calculated by the following equations.<sup>1, 2</sup>

$$\Delta d = \frac{1}{4} \sum_{n=1}^4 \left( \frac{d_n - d}{d} \right)^2$$

$$\sigma^2 = \frac{1}{5} \sum_{n=1}^6 (\theta_n - 109.47^\circ)^2$$

In the above equations,  $d_n$  and  $d$  represents the individual bond length and average bond length in  $[\text{CuBr}_4]^{3-}$  tetrahedron;  $\theta_n$  is the specific Br-Cu-Br bond angle and average in  $[\text{CuBr}_4]^{3-}$  tetrahedron.  $\Delta d$  describes the overall tetrahedral elongation and variation in tetrahedral bond distance, and the variation and deviation of bond angle in  $[\text{CuBr}_4]^{3-}$  tetrahedron could be reflected by  $\sigma^2$ . Taking these two parameters into consideration, the distortion of 1D Ag-alloyed  $\beta\text{-Cs}_3\text{Cu}_2\text{Br}_5$  crystal lattice induced by temperature and Ag ion can be correctly determined.

### ***Computational methods***

The DFT calculations were performed on Vienna ab initio Simulation package (VASP)<sup>3, 4</sup> with projector augmented wave (PAW) pseudopotential.<sup>5, 6</sup> The exchange-correlation interaction was described by Perdew-Burke-Ernzerhof (PBE) functional within the generalized gradient approximation (GGA).<sup>7, 8</sup> The kinetic energy cut-off was set to 400 eV. The Brillouin zone was sampled by Gamma-centered (Monkhorst-Pack) k-point with  $2 \times 3 \times 3$ . The convergence criterion of force and energy were set to  $0.01 \text{ eV } \text{\AA}^{-1}$  and  $10^{-5} \text{ eV}$ , respectively.<sup>9, 10</sup>

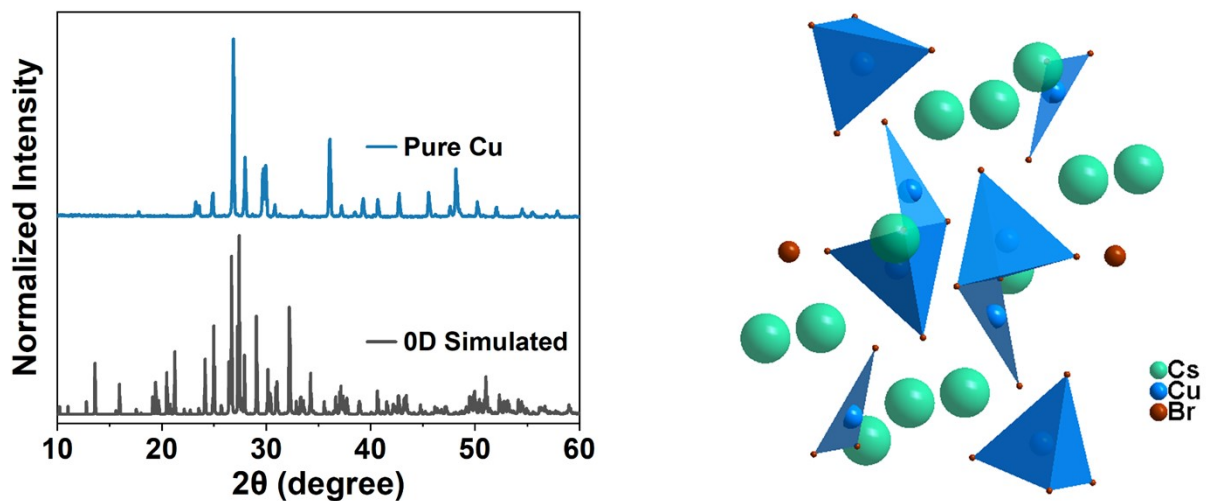

**Fig. S1** PXR D patterns of blue-emissive copper bromide crystals, and the crystal structure of 0D  $\text{Cs}_3\text{Cu}_2\text{Br}_5$ .

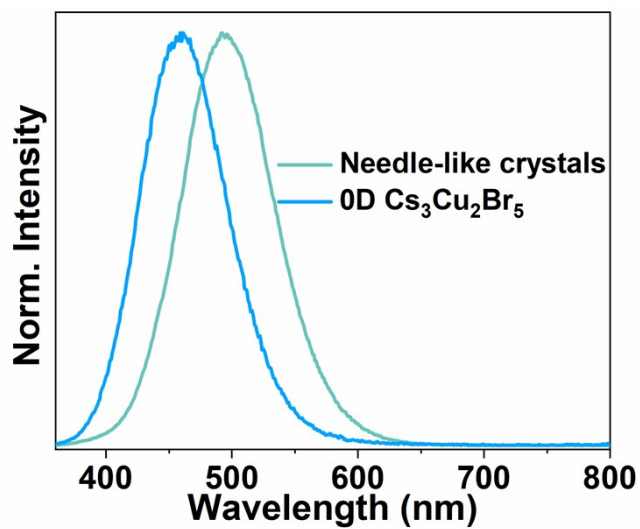

**Fig. S2** PL spectra of 0D  $\text{Cs}_3\text{Cu}_2\text{Br}_5$  and needle-like crystals.

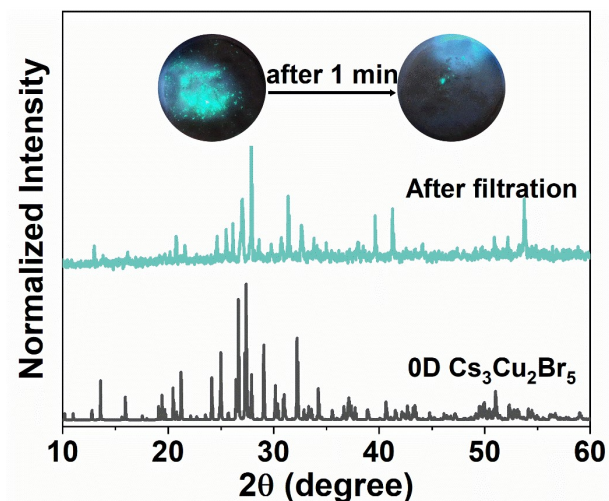

**Fig. S3** PXR D patterns of needle-shape copper bromide crystals after filtration.

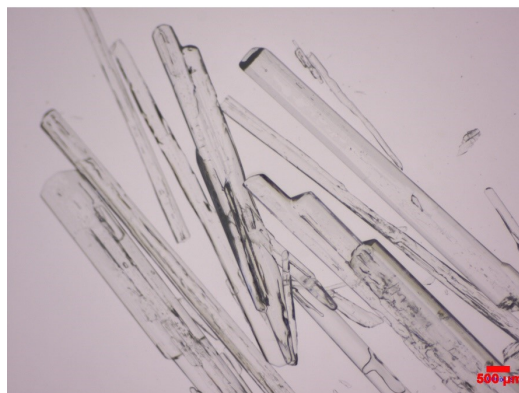

**Fig. S4** Photograph of the synthesized 1D  $\text{Cs}_3(\text{Cu}/\text{Ag})_2\text{Br}_5$  crystal under optical microscope.

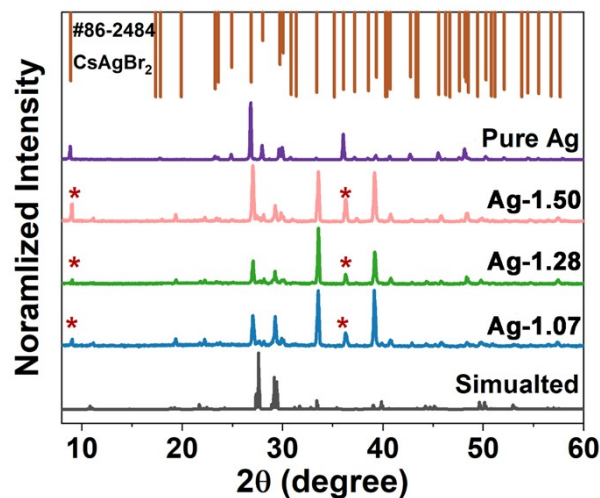

**Fig. S5** PXRD patterns of Ag-1.07, Ag-1.28, Ag-1.50 and pure Cesium silver bromide crystals. (The asterisks represent the  $\text{CsAgBr}_2$  impurities, 1.07, 1.28 and 1.50 represents the Ag/Cu feeding ratio.)

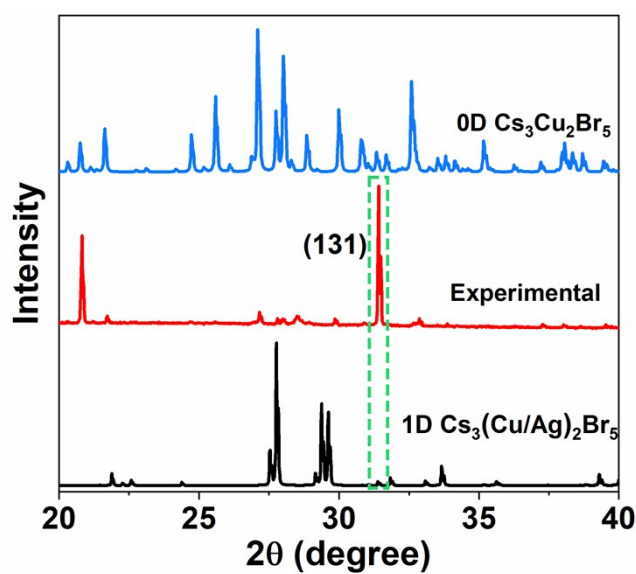

**Fig. S6** The comparison of the PXRD patterns of needle-like crystals, 1D  $\text{Cs}_3(\text{Cu/Ag})_2\text{Br}_5$  and 0D  $\text{Cs}_3\text{Cu}_2\text{Br}_5$ .

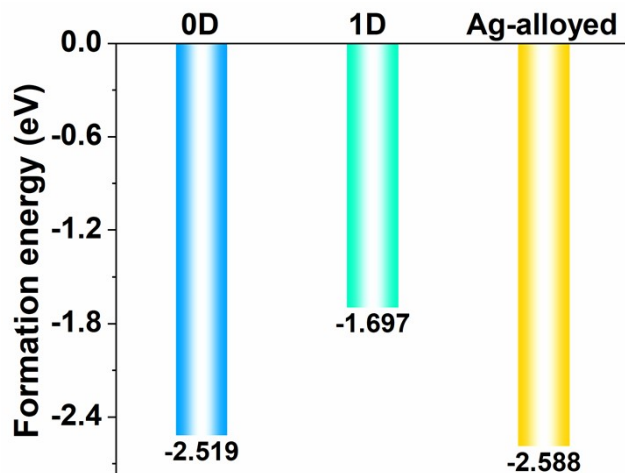

**Fig. S7** Formation energy of 0D  $\text{Cs}_3\text{Cu}_2\text{Br}_5$ , 1D  $\beta\text{-Cs}_3\text{Cu}_2\text{Br}_5$  and Ag-alloyed  $\beta\text{-Cs}_3\text{Cu}_2\text{Br}_5$  (Selected  $\beta\text{-Cs}_3\text{Cu}_2\text{Br}_5:32.35\%\text{Ag}^+$  as model). The formation energies are calculated with respect to the precursors CsBr, CuBr and AgBr, as  $E_f = E[\text{Cs}_3\text{Cu}_2\text{Br}_5] - 3E[\text{CsBr}] - 2E[\text{CuBr}]$ , where E is the total energy. Calculations are performed at 0 K and 0 Gpa.

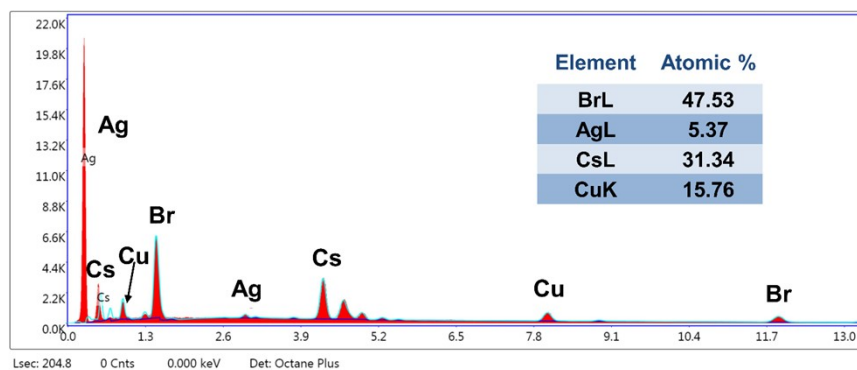

**Fig. S8** EDS results of  $\beta\text{-Cs}_3\text{Cu}_2\text{Br}_5:20.56\%\text{Ag}^+$ , and the inset table shows the estimated atom ratio of Cs, Ag, Cu and Br, respectively.



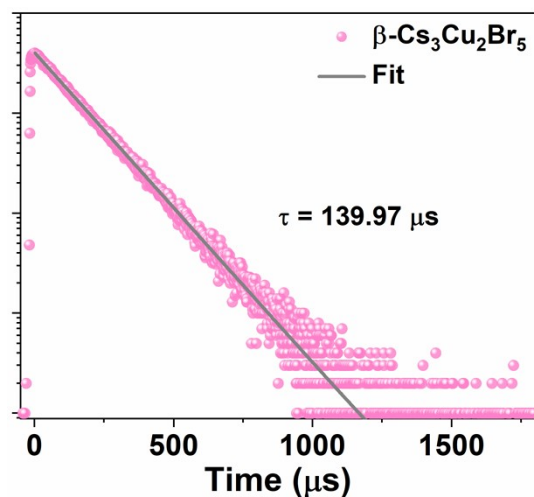

**Fig. S9** PL decay curve of 1D  $\beta\text{-Cs}_3\text{Cu}_2\text{Br}_5$  sample at room temperature.

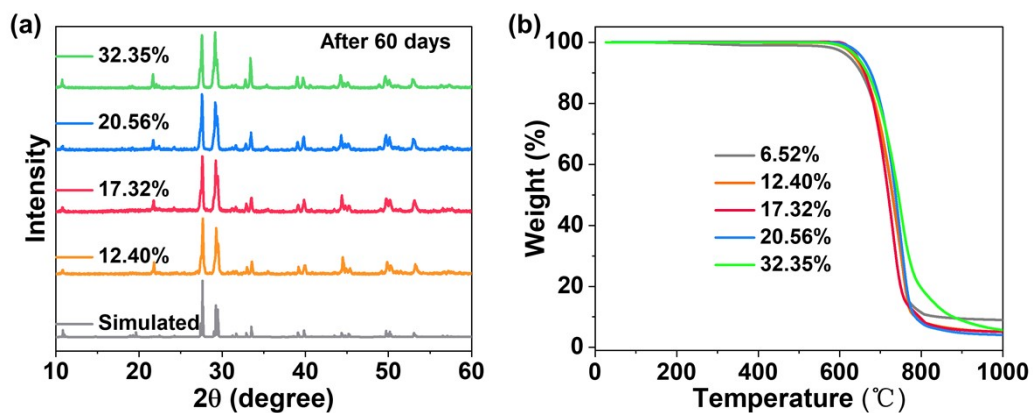

**Fig. S10** (a) PXRD patterns of Ag-alloyed  $\beta\text{-Cs}_3\text{Cu}_2\text{Br}_5$  samples after storing at ambient conditions for 60 days. (b) thermogravimetric analysis of Ag-alloyed  $\beta\text{-Cs}_3\text{Cu}_2\text{Br}_5$  samples.

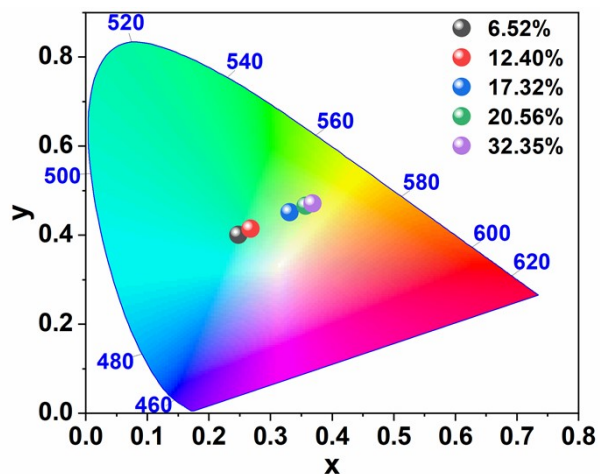

Fig. S11 CIE color coordinates of  $\beta\text{-Cs}_3\text{Cu}_2\text{Br}_5:\text{xAg}$ .

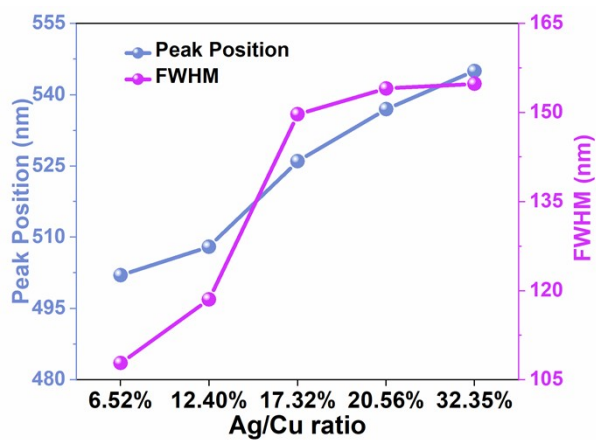

Fig. S12 Peak positions and FWHM of Ag-alloyed  $\beta\text{-Cs}_3\text{Cu}_2\text{Br}_5$ .

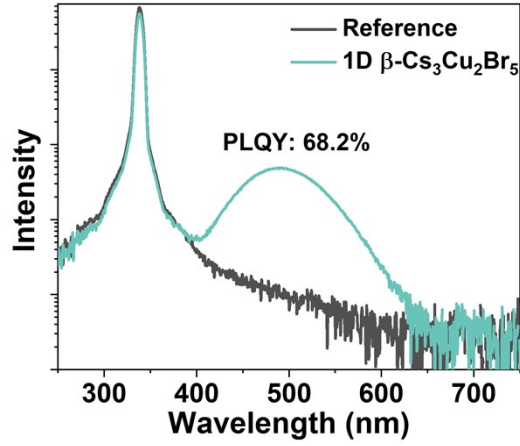

Fig. S13 PLQY of 1D  $\beta$ - $\text{Cs}_3\text{Cu}_2\text{Br}_5$ .

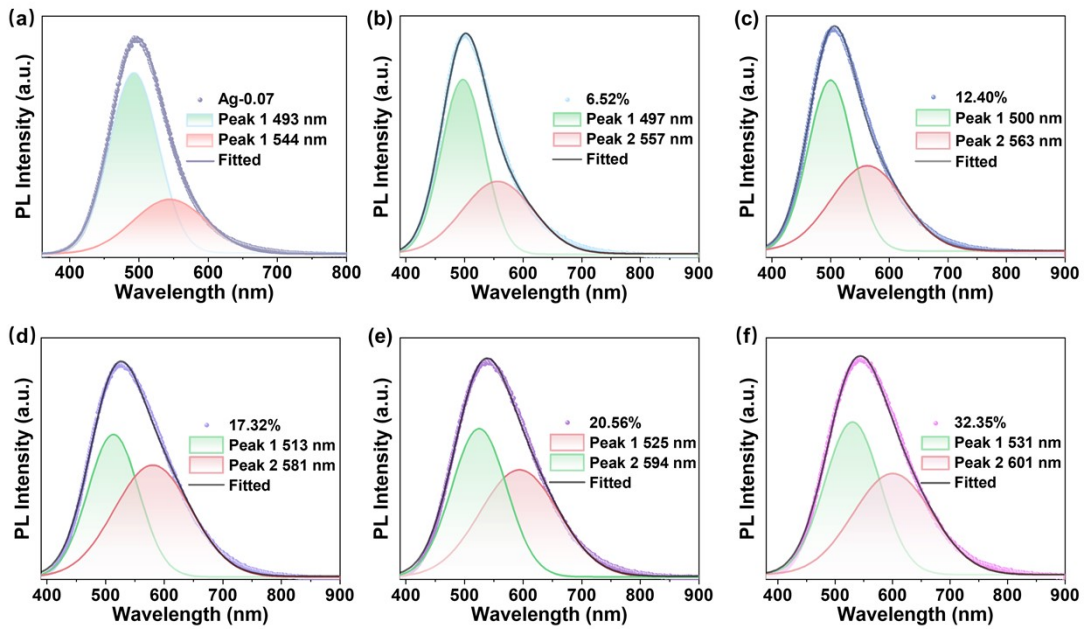

Fig. S14 PL spectra of  $\beta$ - $\text{Cs}_3\text{Cu}_2\text{Br}_5:\text{xAg}^+$  with fitting by two Gaussian distributions, peak 1 and peak 2 (Note: In Fig.S13a, 0.07 represents the feeding Ag/Cu ratio.).

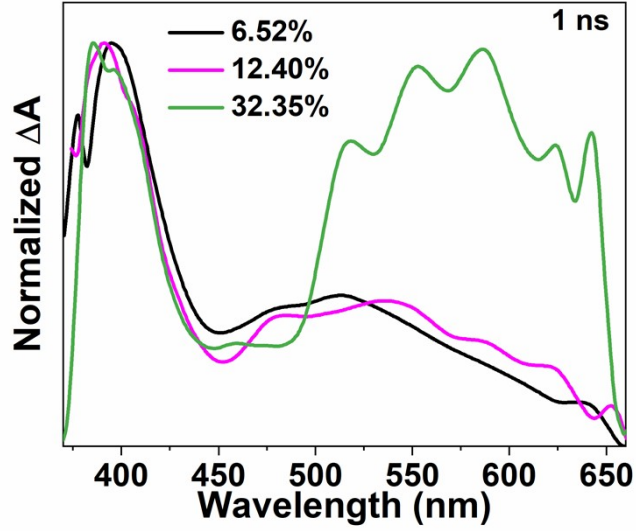

**Fig. S15** The fs-TA spectra of  $\beta\text{-Cs}_3\text{Cu}_2\text{Br}_5\text{:xAg}^+$  ( $x = 6.52\%$ ,  $12.40\%$  and  $32.35\%$ ) at the detection time of 1 ns.

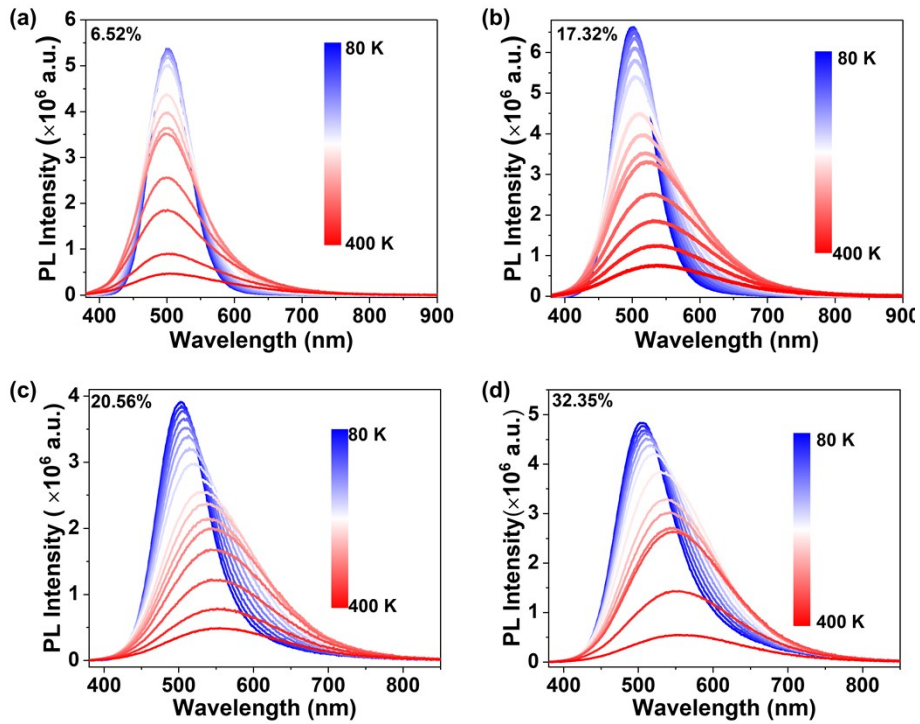

**Fig. S16** Temperature-dependent PL spectra of  $\beta\text{-Cs}_3\text{Cu}_2\text{Br}_5\text{:xAg}^+$  ( $x = 6.52\%$ ,  $17.32\%$ ,  $20.56\%$  and  $32.35\%$ ) samples

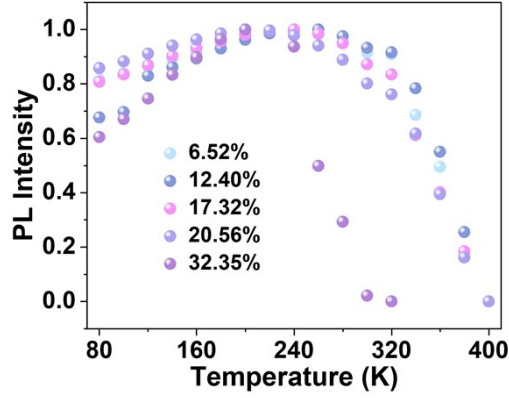

**Fig. S17** Temperature-dependent PL intensity of  $\beta\text{-Cs}_3\text{Cu}_2\text{Br}_5\text{:xAg}^+$  ( $x= 6.52\%$ ,  $12.40\%$ ,  $17.32\%$ ,  $20.56\%$  and  $32.35\%$ ) samples

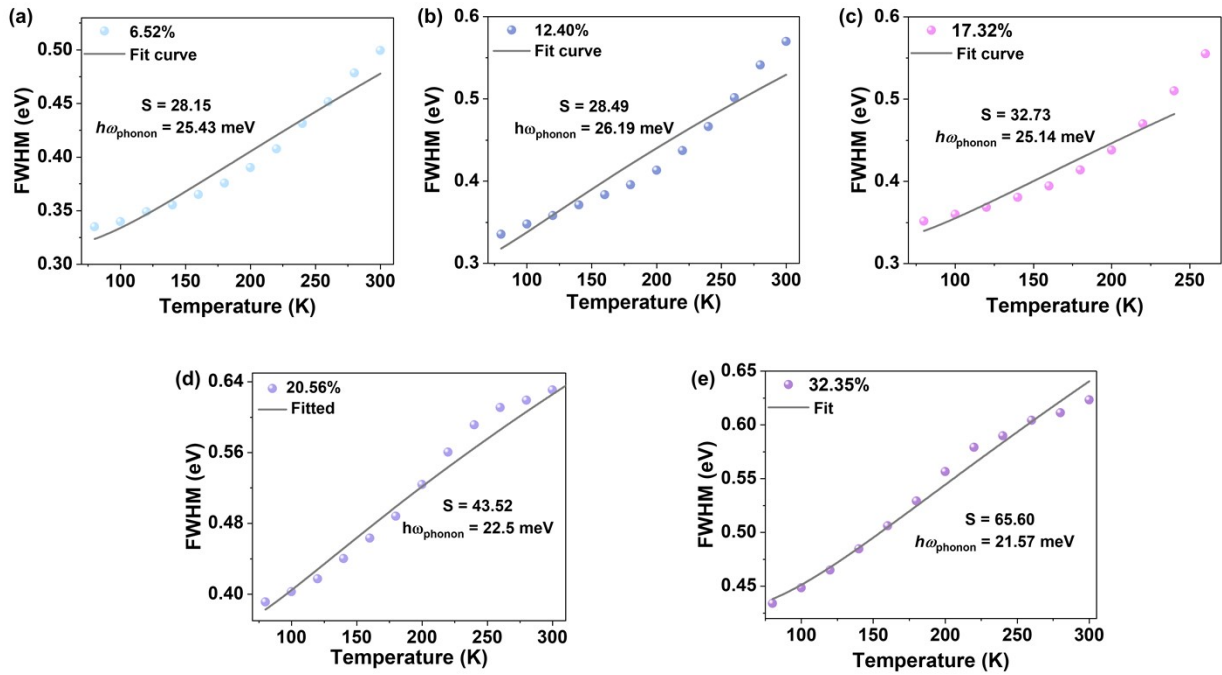

**Fig. S18** Temperature-dependent FWHM and fitting curves.

**Note.** Huang-Rhys factor  $S$  is used to describe the strength of electron-phonon coupling, and the electron-phonon coupling has a strong relationship with the FWHM of emission, meeting the following equation<sup>11</sup>

$$FWHM = 2.36\sqrt{S}\hbar\omega_{phonon}\sqrt{\coth\frac{\hbar\omega_{phonon}}{2k_B T}}$$

where  $\hbar$  is reduced Planck constant,  $\omega_{phonon}$  represents phonon frequency,  $T$  is temperature, and  $k_B$  Boltzmann constant.

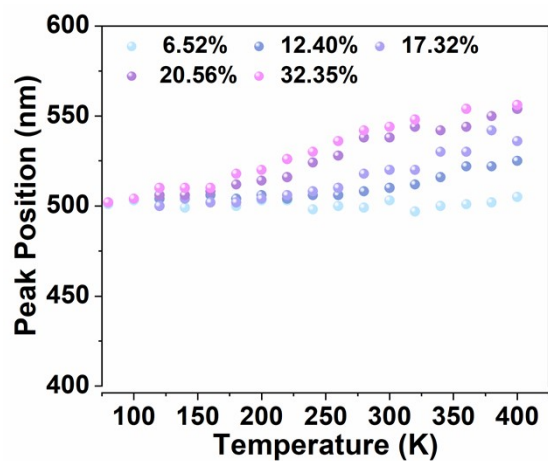

Fig. S19 Temperature-dependent peak position evolution of Ag-alloyed  $\beta$ -Cs<sub>3</sub>Cu<sub>2</sub>Br<sub>5</sub>.

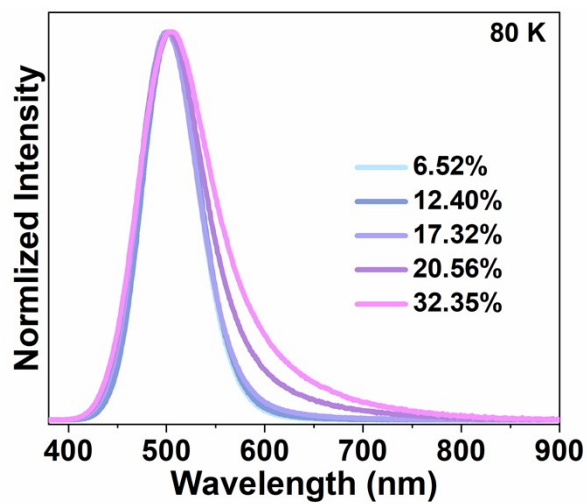

Fig. S20 PL spectra of Ag-alloyed  $\beta$ -Cs<sub>3</sub>Cu<sub>2</sub>Br<sub>5</sub> at 80 K.

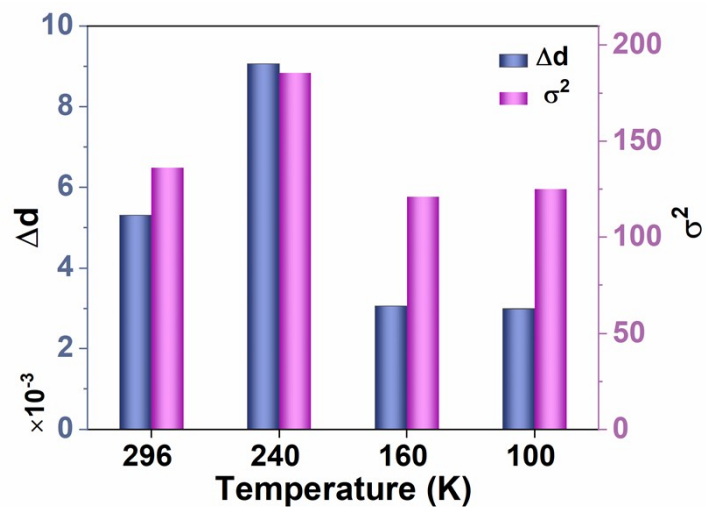

Fig. S21 Tetrahedral parameters of  $\beta\text{-Cs}_3\text{Cu}_2\text{Br}_5:32.35\%\text{Ag}^+$  at different temperature.

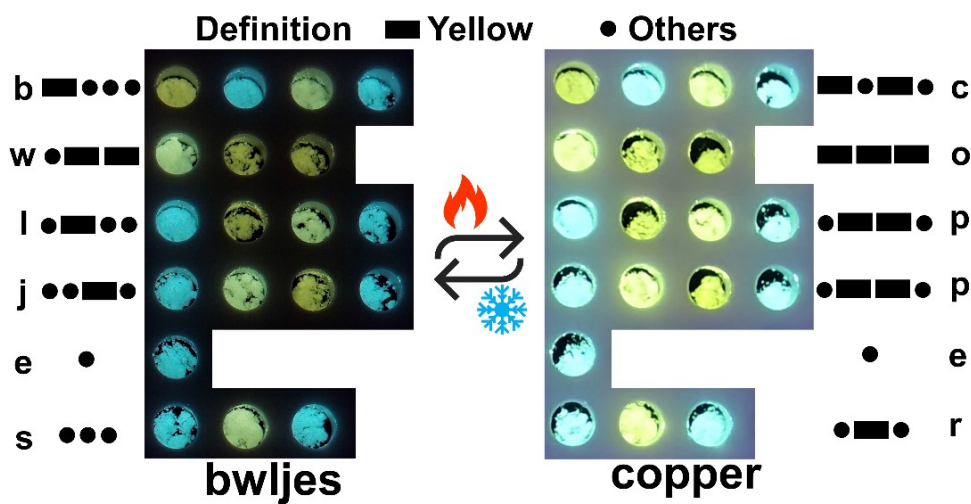

Fig. S22 Images of  $\beta\text{-Cs}_3(\text{Cu}/\text{Ag})_2\text{Br}_5$  based encryption and decryption patterns. The encryption word 'copper' shows wrong information as 'bwljes' under room temperature.

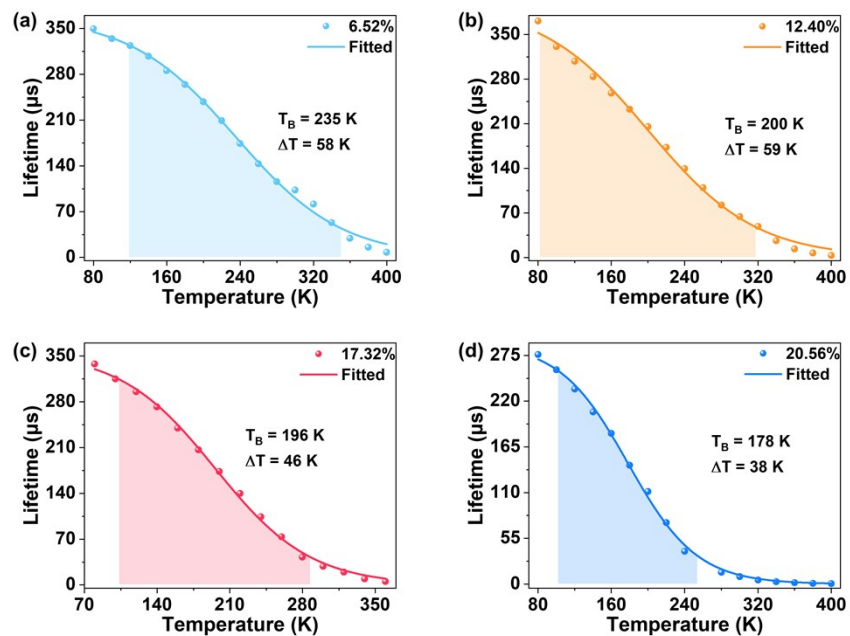

**Fig. S23** Temperature dependence of lifetime in Ag-alloyed  $\beta$ - $\text{Cs}_3\text{Cu}_2\text{Br}_5$  samples. The filled color areas represent the sensing range.

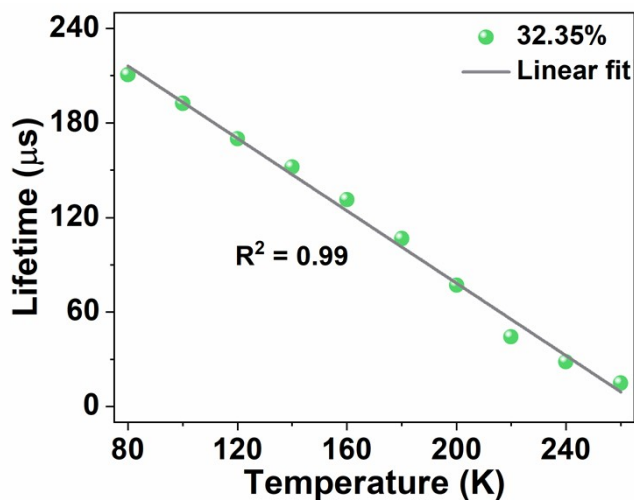

**Fig. S24** Linear relationship between temperature and average lifetime of Ag-0.85 in the range of 80 to 260 K.



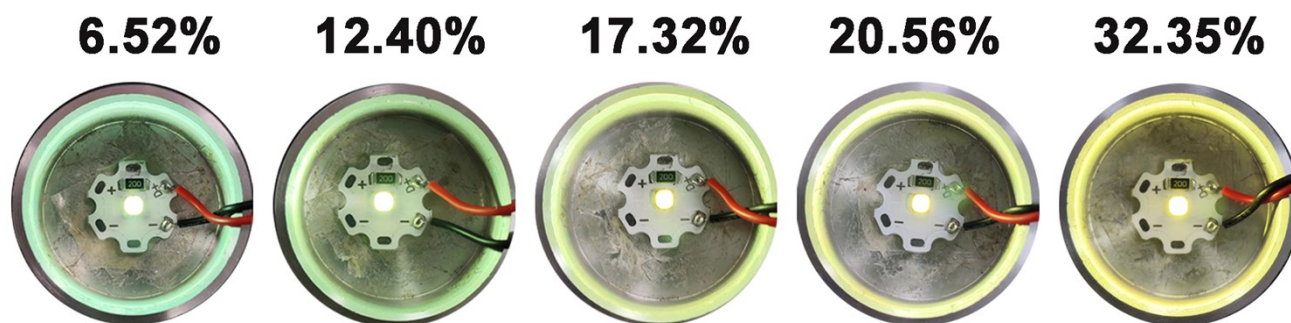

**Fig. S25** Photograph of the fabricated LED device based on different  $\beta$ - $\text{Cs}_3\text{Cu}_2\text{Br}_5:\text{xAg}^+$  samples.

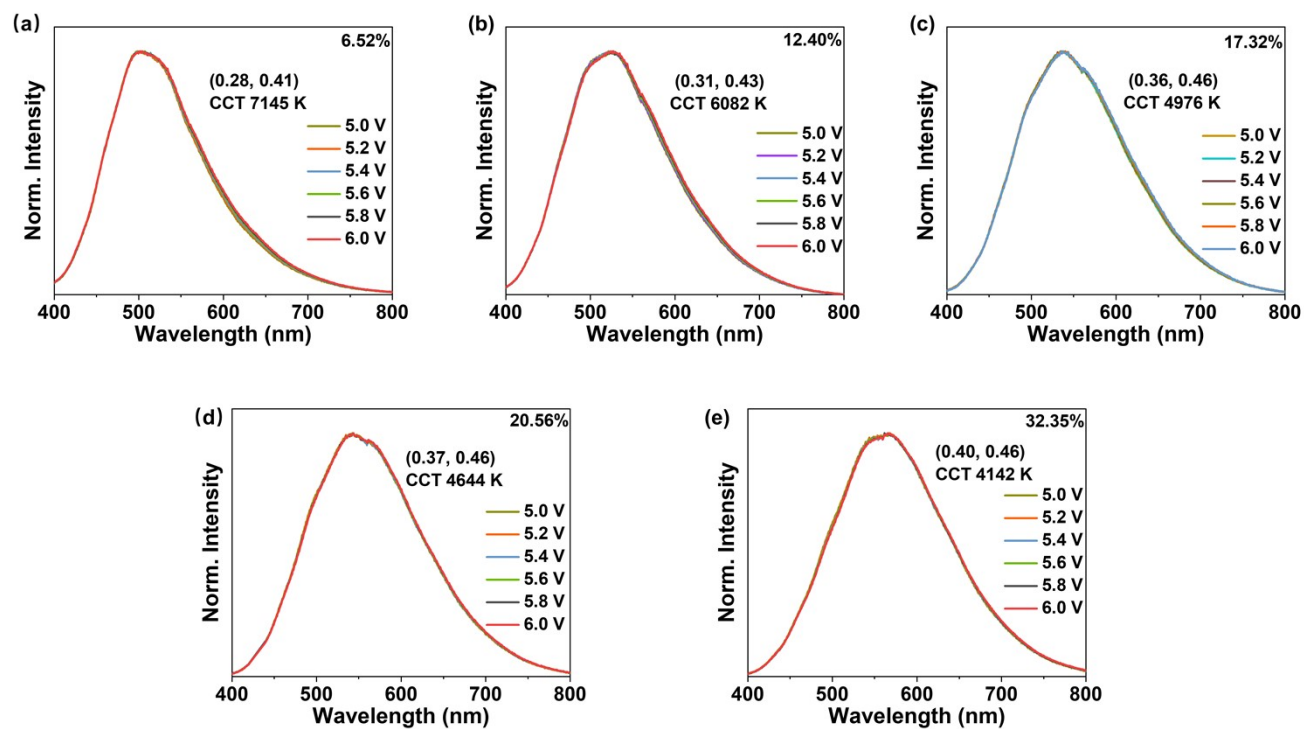

**Fig. S26** EL spectra of fabricated LED device based on different  $\beta$ - $\text{Cs}_3\text{Cu}_2\text{Br}_5:\text{xAg}^+$  samples under different voltage.

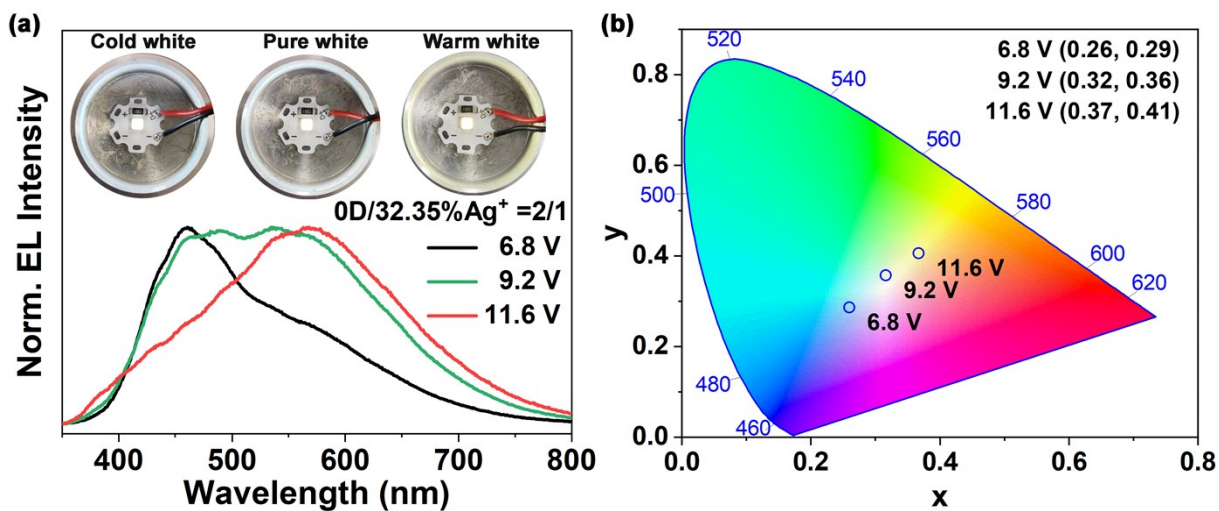

Fig. S27 (a) EL spectra and photograph of LED device based on a mixture of OD and  $\beta$ - $\text{Cs}_3\text{Cu}_2\text{Br}_5:32.35\%\text{Ag}^+$  samples with a mass ratio of 2:1 and a 275 nm UV LED chip under different voltage, and (b) the corresponding CIE color coordinate change.

**Table S1.** ICP-MS results of Ag and Cu in Ag-alloyed  $\beta$ - $\text{Cs}_3\text{Cu}_2\text{Br}_5$ .

| Sample  | Ag (mg/L) | Cu (mg/L) | Ag/Cu ratio in feeding solution | Actual Ag/Cu ratio |
|---------|-----------|-----------|---------------------------------|--------------------|
| Ag-0.11 | 2.5131    | 21.203    | 11%                             | 6.52%              |
| Ag-0.21 | 4.5771    | 19.048    | 21%                             | 12.40%             |
| Ag-0.43 | 9.5196    | 26.769    | 43%                             | 17.32%             |
| Ag-0.64 | 10.445    | 23.774    | 64%                             | 20.56%             |
| Ag-0.85 | 15.877    | 12.888    | 85%                             | 32.35%             |

**Table S2.** Crystal data and structure refinement for Ag-0.11 and Ag-0.85.

| Compound                                          | $\text{Cs}_3\text{Cu}_2\text{Br}_5$                                    | $\text{Cs}_3\text{Cu}_{1.5}\text{Ag}_{0.5}\text{Br}_5$                  |
|---------------------------------------------------|------------------------------------------------------------------------|-------------------------------------------------------------------------|
|                                                   | ( $\beta$ - $\text{Cs}_3\text{Cu}_2\text{Br}_5$ :6.52% $\text{Ag}^+$ ) | ( $\beta$ - $\text{Cs}_3\text{Cu}_2\text{Br}_5$ :32.35% $\text{Ag}^+$ ) |
| Formula weight ( $\text{g}\cdot\text{mol}^{-1}$ ) | 925.36                                                                 | 947.49                                                                  |
| Temperature (K)                                   | 279                                                                    | 297                                                                     |
| Crystal system                                    | orthorhombic                                                           | orthorhombic                                                            |
| Space group                                       | Cmcm (63)                                                              | Cmcm (63)                                                               |
| Cell parameters                                   | a = 16.2298(6) Å                                                       | a = 16.3496(6) Å                                                        |
|                                                   | b = 9.1626(3) Å                                                        | b = 9.2138(3) Å                                                         |
|                                                   | c = 9.0004(3) Å                                                        | c = 9.0533(3) Å                                                         |
|                                                   | $\alpha, \beta, \gamma = 90^\circ$                                     | $\alpha, \beta, \gamma = 90^\circ$                                      |
| Volume (Å <sup>3</sup> )                          | 1338.42(8)                                                             | 1363.81(8)                                                              |
| Z                                                 | 2                                                                      | 16                                                                      |
| Density ( $\text{g}\cdot\text{cm}^{-3}$ )         | 4.592                                                                  | 4.615                                                                   |
| $\mu$ ( $\text{mm}^{-1}$ )                        | 26.090                                                                 | 25.543                                                                  |
| <i>F</i> (000)                                    | 1228.0                                                                 | 1628.0                                                                  |
| Theta max (°)                                     | 30.660                                                                 | 30.644                                                                  |
| h, k, <i>l</i> <sub>max</sub>                     | 23, 12, 12                                                             | 22, 13, 12                                                              |
| GOF.                                              | 1.106                                                                  | 1.094                                                                   |
| Final R index                                     | $R_1 = 0.0388(942)$                                                    | $R_1 = 0.0267$                                                          |
|                                                   | $wR_2 = 0.1046(1080)$                                                  | $wR_2 = 0.0752$                                                         |

**Table S3.** The fitted results of the PL decay curves of Ag-alloyed  $\beta$ - $\text{Cs}_3\text{Cu}_2\text{Br}_5: x\text{Ag}^+$ .

| Sample                | Excitation | Monitoring |                            |         |                    |                            |         |                    | $\tau_{\text{ave}}$  |
|-----------------------|------------|------------|----------------------------|---------|--------------------|----------------------------|---------|--------------------|----------------------|
|                       | wavelength | wavelength | $\tau_1$ ( $\mu\text{s}$ ) | $A_1$   | Rel <sub>1</sub> % | $\tau_2$ ( $\mu\text{s}$ ) | $A_2$   | Rel <sub>2</sub> % | (<br>$\mu$<br>s<br>) |
| 6.52%Ag <sup>+</sup>  | 340 nm     | 502 nm     | 33.38                      | 1371.84 | 8.56               | 149.19                     | 3278.77 | 91.54              | 139.28               |
| 12.40%Ag <sup>+</sup> | 340 nm     | 508 nm     | 18.90                      | 2250.22 | 16.99              | 90.22                      | 2302.78 | 83.01              | 78.09                |
| 17.32%Ag <sup>+</sup> | 340 nm     | 526 nm     | 6.06                       | 0.1456  | 27.78              | 45.92                      | 0.0453  | 70.22              | 34.05                |
| 20.56%Ag <sup>+</sup> | 340 nm     | 537 nm     | 2.81                       | 0.1185  | 54.16              | 19.92                      | 0.0142  | 45.84              | 10.65                |
| 32.35%Ag <sup>+</sup> | 340 nm     | 545 nm     | 2.00                       | 0.0368  | 61.61              | 12.60                      | 0.0036  | 38.39              | 6.07                 |

**Table S4.** The bond length and bond angle evolution of  $\beta\text{-Cs}_3\text{Cu}_2\text{Br}_5:\text{xAg}^+$  ( $x = 12.40\%$ ,  $17.32\%$ ,  $20.56\%$ ,  $32.35\%$ ),  $r_1$  and  $r_2$  corresponding to intratetrahedral and intertetrahedral Cu-Cu distance of  $[\text{Cu}_2\text{Br}_6]^{4-}$  units, respectively.

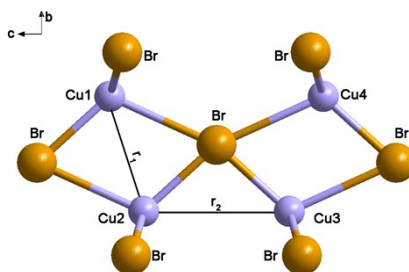

| Bond length (Å) | 12.40%  | 17.32%  | 20.56%  | 32.35%  |
|-----------------|---------|---------|---------|---------|
| Cu1 – Br1       | 2.4277  | 2.4293  | 2.4298  | 2.472   |
| Cu1 – Br2       | 2.4714  | 2.9012  | 2.5221  | 2.508   |
| Cu1 – Br3       | 2.9288  | 2.5385  | 2.4298  | 2.919   |
| Cu1 – Br4       | 2.4277  | 2.4293  | 2.9810  | 2.472   |
| $r_1$           | 2.9752  | 3.2327  | 3.1326  | 2.9742  |
| $r_2$           | 3.6655  | 3.5857  | 3.6185  | 3.6974  |
| Bond Angles (°) | 12.40%  | 17.32%  | 20.56%  | 32.35%  |
| Br1-Cu1-Br2     | 122.741 | 95.259  | 113.927 | 122.404 |
| Br1-Cu1-Br3     | 113.839 | 113.065 | 124.977 | 94.361  |
| Br1-Cu1-Br4     | 94.167  | 95.259  | 93.398  | 113.794 |
| Br2-Cu1-Br3     | 113.839 | 112.691 | 113.927 | 94.361  |
| Br2-Cu1-Br4     | 113.763 | 124.272 | 111.187 | 113.794 |
| Br3-Cu1-Br4     | 94.167  | 112.691 | 93.398  | 114.039 |
| Br-Br-Br        | 168.29  | 167.497 | 167.025 | 166.58  |

**Table S5.** The refinement crystal parameters of  $\beta$ - $\text{Cs}_3\text{Cu}_2\text{Br}_5:32.35\%\text{Ag}^+$  under different temperatures.

| Compound                      | $\text{Cs}_3\text{Cu}_{1.5}\text{Ag}_{0.5}\text{Br}_5$ ( $\beta$ - $\text{Cs}_3\text{Cu}_2\text{Br}_5:32.35\%\text{Ag}^+$ ) |                                    |                                    |                                    |
|-------------------------------|-----------------------------------------------------------------------------------------------------------------------------|------------------------------------|------------------------------------|------------------------------------|
| Temperature (K)               | 297                                                                                                                         | 240                                | 160                                | 100                                |
| Formula weight                | 947.49                                                                                                                      | 947.49                             | 947.49                             | 947.49                             |
| Crystal system                | orthorhombic                                                                                                                | orthorhombic                       | orthorhombic                       | orthorhombic                       |
| Space group                   | Cmcm (63)                                                                                                                   | Cmcm (63)                          | Cmcm (63)                          | Cmcm (63)                          |
| Cell parameters               | a = 16.3496(6) Å                                                                                                            | a = 16.3094(4) Å                   | a = 16.2746(4) Å                   | a = 16.2466(4) Å                   |
|                               | b = 9.2138(3) Å                                                                                                             | b = 9.1770(2) Å                    | b = 9.1408(2) Å                    | b = 9.1132(2) Å                    |
|                               | c = 9.0533(3) Å                                                                                                             | c = 9.0242(3) Å                    | c = 8.9973(2) Å                    | c = 8.9796(2) Å                    |
|                               | $\alpha, \beta, \gamma = 90^\circ$                                                                                          | $\alpha, \beta, \gamma = 90^\circ$ | $\alpha, \beta, \gamma = 90^\circ$ | $\alpha, \beta, \gamma = 90^\circ$ |
| Volume (Å <sup>3</sup> )      | 1363.81(8)                                                                                                                  | 1350.66(6)                         | 1338.46(5)                         | 1329.51(5)                         |
| Z                             | 16                                                                                                                          | 16                                 | 16                                 | 16                                 |
| Density (g·cm <sup>-3</sup> ) | 4.615                                                                                                                       | 4.660                              | 4.702                              | 4.734                              |
| $\mu$ (mm <sup>-1</sup> )     | 25.543                                                                                                                      | 25.792                             | 26.027                             | 26.202                             |
| F (000)                       | 1628.0                                                                                                                      | 1628.0                             | 1628.0                             | 1628.0                             |
| Theta max (°)                 | 30.644                                                                                                                      | 30.660                             | 30.660                             | 30.660                             |
| h, k, lmax                    | 22, 13, 12                                                                                                                  | 23, 13, 12                         | 22, 12, 12                         | 22, 13, 12                         |
| GOF.                          | 1.094                                                                                                                       | 1.094                              | 1.067                              | 1.086                              |
| Final R index                 | $R_1=0.0267$                                                                                                                | $R_1=0.0311$                       | $R_1=0.0304$                       | $R_1=0.0274$                       |
|                               | $wR_2=0.0752$                                                                                                               | $wR_2=0.0838$                      | $wR_2=0.0798$                      | $wR_2=0.0714$                      |

**Table S6.** The fitted results of the PL decay curves at different temperature for  $\beta$ - $\text{Cs}_3\text{Cu}_2\text{Br}_5:12.40\%\text{Ag}^+$ .

| Temperature (K) | $\tau_1$ ( $\mu\text{s}$ ) | rel <sub>1</sub> % | $\tau_2$ ( $\mu\text{s}$ ) | rel <sub>2</sub> % | $\tau_{\text{ave}}$ ( $\mu\text{s}$ ) |
|-----------------|----------------------------|--------------------|----------------------------|--------------------|---------------------------------------|
| 80              | 8.73                       | 1.85               | 378                        | 98.15              | 371.2                                 |
| 100             | 5.38                       | 2.13               | 338.4                      | 97.87              | 331.3                                 |
| 120             | 7.049                      | 2.37               | 315.3                      | 97.63              | 308.0                                 |
| 140             | 19.20                      | 2.82               | 291.6                      | 97.18              | 283.9                                 |
| 160             | 23.57                      | 3.45               | 266.5                      | 96.55              | 258.1                                 |
| 180             | 23.21                      | 4.32               | 242.4                      | 95.68              | 232.9                                 |
| 200             | 18.81                      | 5.7                | 216.7                      | 94.30              | 205.4                                 |
| 220             | 21.78                      | 7.4                | 185.1                      | 92.60              | 173.0                                 |
| 240             | 21.24                      | 9.62               | 152.1                      | 90.38              | 139.5                                 |
| 260             | 20                         | 12.56              | 122.7                      | 87.44              | 109.8                                 |
| 280             | 19.23                      | 15.97              | 94.68                      | 84.03              | 82.63                                 |
| 300             | 17.90                      | 19.72              | 75.88                      | 80.28              | 64.45                                 |
| 320             | 14.84                      | 21.36              | 57.87                      | 78.64              | 48.68                                 |
| 340             | 5.79                       | 19.9               | 31.7                       | 80.10              | 26.55                                 |
| 360             | 3.574                      | 22.13              | 16.19                      | 77.87              | 13.4                                  |
| 380             | 2.34                       | 24.22              | 8.76                       | 75.78              | 7.2                                   |
| 400             | 1.34                       | 31.60              | 4.36                       | 68.40              | 3.40                                  |

**Table S7.** The fitted results of the PL decay curves of  $\beta$ -Cs<sub>3</sub>Cu<sub>2</sub>Br<sub>5</sub>:x%Ag<sup>+</sup>.

| Sample | Temperature (K) | $\tau_1$ ( $\mu$ s) | rel <sub>1</sub> % | $\tau_2$ ( $\mu$ s) | rel <sub>2</sub> % | $\tau_3$ ( $\mu$ s) | rel <sub>3</sub> % | $\tau_{ave}$ ( $\mu$ s) |
|--------|-----------------|---------------------|--------------------|---------------------|--------------------|---------------------|--------------------|-------------------------|
| 6.52%  | 80              | 26.51               | 1.67               | 355.4               | 98.33              |                     |                    | 349.9                   |
|        | 360             | 6.17                | 15.35              | 33.68               | 84.65              |                     |                    | 29.45                   |
| 17.32% | 80              | 13.87               | 4.08               | 351.9               | 95.92              |                     |                    | 338.1                   |
|        | 360             | 1.96                | 28.24              | 6.44                | 71.76              |                     |                    | 5.18                    |
| 20.56% | 80              | 4.66                | 8.7                | 58.73               | 14.54              | 347.9               | 76.76              | 276                     |
|        | 360             | 0.64                | 35.06              | 2.21                | 64.94              |                     |                    | 1.66                    |
| 32.35% | 80              | 4.44                | 11.88              | 46.53               | 18.68              | 290.2               | 69.44              | 210.7                   |
|        | 360             | 0.55                | 42.08              | 1.64                | 57.92              |                     |                    | 1.18                    |

**Table S8.** Summary of the recent reports on traditional materials and metal halide-based thermometry.

| Materials                                                                            | Probe range (K) | $\alpha_{max}$ (K <sup>-1</sup> %) | Ref.      |
|--------------------------------------------------------------------------------------|-----------------|------------------------------------|-----------|
| YVO <sub>4</sub> :YbTm                                                               | 300-1009        | 2.13                               | S12       |
| [C(NH <sub>2</sub> ) <sub>3</sub> ] <sub>2</sub> SnBr <sub>4</sub>                   | 173-303         | 6.0                                | S13       |
| (C <sub>9</sub> H <sub>15</sub> N <sub>3</sub> )ZnCl <sub>4</sub> : Mn <sup>2+</sup> | 110-290         | 0.57                               | S14       |
| N,S-Carbon dots                                                                      | 275-353         | 1.79                               | S15       |
| PbS QDs                                                                              | 150-350         | 1.3                                | S16       |
| $\beta$ -Cs <sub>3</sub> Cu <sub>2</sub> Br <sub>5</sub> :6.52%Ag <sup>+</sup>       | 119-351         | 1.6                                | This work |
| $\beta$ -Cs <sub>3</sub> Cu <sub>2</sub> Br <sub>5</sub> :32.35%Ag <sup>+</sup>      | 102-246         | 2.8                                | This work |



**Table S9.** Summary of LED device performance based on  $\beta\text{-Cs}_3\text{Cu}_2\text{Br}_5:x\%\text{Ag}^+$ 

| Sample                                                       | EQE   | CRI   |
|--------------------------------------------------------------|-------|-------|
| $\beta\text{-Cs}_3\text{Cu}_2\text{Br}_5:6.52\%\text{Ag}^+$  | 0.35% | 69.51 |
| $\beta\text{-Cs}_3\text{Cu}_2\text{Br}_5:12.40\%\text{Ag}^+$ | 0.63% | 70.35 |
| $\beta\text{-Cs}_3\text{Cu}_2\text{Br}_5:17.32\%\text{Ag}^+$ | 0.33% | 70.62 |
| $\beta\text{-Cs}_3\text{Cu}_2\text{Br}_5:20.56\%\text{Ag}^+$ | 0.64% | 71.63 |
| $\beta\text{-Cs}_3\text{Cu}_2\text{Br}_5:32.35\%\text{Ag}^+$ | 0.67% | 74.2  |
| OD $\text{Cs}_3\text{Cu}_2\text{Br}_5 + 32.35\%\text{Ag}^+$  | 0.11% | 83.49 |

## SUPPORTING REFERENCES

1. Q. Li, Z. Chen, B. Yang, L. Tan, B. Xu, J. Han, Y. Zhao, J. Tang and Z. Quan, Pressure-Induced Remarkable Enhancement of Self-Trapped Exciton Emission in One-Dimensional  $\text{CsCu}_2\text{I}_3$  with Tetrahedral Units, *J. Am. Chem. Soc.*, 2020, **142**, 1786-1791.
2. K. Robinson, G. V. Gibbs and P. H. Ribbe, Quadratic Elongation-Quantitative Measure of Distortion in Coordination Polyhedra, *Science*, 1971, **172**, 567-570.
3. J. F. G. Kresse, Efficient Iterative Schemes for Ab Initio Total-Energy Calculations Using a Plane-Wave Basis Set, *Phys. Rev. B*, 1996, **54**, 11169-11186.
4. G. Kresse and J. Hafner, Ab Initio Molecular-Dynamics Simulation of the Liquid-Metal–Amorphous-Semiconductor Transition in Germanium, *Phys. Rev. B*, 1994, **49**, 14251-14269.
5. P. E. Blöchl, Projector Augmented-Wave Method, *Phys. Rev. B*, 1994, **50**, 17953-17979.
6. G. K. D. Joubert, From ultrasoft pseudopotentials to the projector augmented-wave method, *Phys. Rev. B* 1999, **59**, 1758-1775.
7. J. P. Perdew, K. Burke and M. Ernzerhof, Generalized Gradient Approximation Made Simple, *Phys. Rev. Lett.*, 1996, **77**, 3865-3868.
8. Y. Zhu, X. Y. Guo, L. N. Jiang, Z. R. Yan, Y. Yan and X. F. Han, Giant Tunneling Magnetoresistance in van der Waals Magnetic Tunnel Junctions Formed by Interlayer Antiferromagnetic Bilayer  $\text{CoBr}_2$ , *Phys. Rev. B*, 2021, **103**, 134437.
9. S. Froyen, Brillouin-Zone Integration by Fourier Quadrature: Special Points for Superlattice and Supercell Calculations, *Phys. Rev. B*, 1989, **39**, 3168-3172.

10. A. Yadav, Vikram, N. Singh and A. Alam, Mixed-Functionalized Sc<sub>2</sub>CT<sub>x</sub> (t=O, OH, F) Mxene for Electrochemical CO<sub>2</sub> Reduction: Insight from First-Principles Calculations, *Phys. Rev. Appl.*, 2022, **18**, 024020.
11. S. Li, S. Li, J. Luo, J. Liu and J. Tang, Self-Trapped Excitons in All-Inorganic Halide Perovskites: Fundamentals, Status, and Potential Applications, *The Journal of Physical Chemistry Letters*, 2019, **10**, 1999-2007. J. Luo, J. Liu and J. Tang, Self-Trapped Excitons in All-Inorganic Halide Perovskites: Fundamentals, Status, and Potential Applications, *J. Phys. Chem. Lett.*, 2019, **10**, 1999-2007.
12. M. Runowski, P. Wozny, N. Stopikowska, I. R. Martin, V. Lavin and S. Lis, Luminescent Nanothermometer Operating at Very High Temperature-Sensing up to 1000 K with Upconverting Nanoparticles (Yb<sup>3+</sup>/Tm<sup>3+</sup>), *ACS Appl. Mater. Interfaces*, 2020, **12**, 43933-43941.
13. S. Yakunin, B. M. Benin, Y. Shynkarenko, O. Nazarenko, M. I. Bodnarchuk, D. N. Dirin, C. Hofer, S. Cattaneo and M. V. Kovalenko, High-Resolution Remote Thermometry and Thermography Using Luminescent Low-Dimensional Tin-Halide Perovskites, *Nat. Mater.*, 2019, **18**, 846-852.
14. X. Zhang, Y. Xiong, K. Liu, N. Wang, L. Fan, W. Li, X. Zhao, J. Zhao and Q. Liu, Thermal Stable Zinc-Based Hybrid Halides with High External Quantum Efficiency as Temperature Detectors, *J. Mater. Chem. C*, 2022, **10**, 13137-13142.
15. S. Kalytchuk, K. Polakova, Y. Wang, J. P. Froning, K. Cepe, A. L. Rogach and R. Zboril, Carbon Dot Nanothermometry: Intracellular Photoluminescence Lifetime Thermal Sensing, *ACS Nano*, 2017, **11**, 1432-1442.
16. H. Zhao, A. Vomiero and F. Rosei, Ultrasensitive, Biocompatible, Self-Calibrating, Multiparametric Temperature Sensors, *Small*, 2015, **11**, 5741-5746.
